# Supplementary material for: Conformational dynamics of amyloid-β (16–22) peptide in aqueous ionic liquids
Source: Royal Society of Chemistry journal article supplement (doi:10.1039/d0ra06609e), 2020-01-01
Supplement: d0ra06609e1.pdf [file d0ra06609e1.pdf]

## Supporting Information

# Conformational dynamics of amyloid- $\beta$ (16-22) peptide in aqueous ionic liquids

Sathish Dasari and Bhabani S. Mallik\*

Department of Chemistry, Indian Institute of Technology Hyderabad, Kandi-502285, Sangareddy, Telangana, India.

\*bhabani@chy.iith.ac.in

**Table S1.** Secondary structure elements with average  $\Psi$  angle for peptide dimer (16-22) in water.

| Average $\Psi$ | Coil | Bend | Turn | $\alpha$ -helix | $3_{10}$ -helix | 5-helix | $\beta$ -sheet | $\beta$ -bridge |
|----------------|------|------|------|-----------------|-----------------|---------|----------------|-----------------|
| 180            | 0.76 |      |      |                 |                 |         | 0.15           | 0.02            |
| 170            | 0.77 |      |      |                 |                 |         | 0.14           | 0.02            |
| 160            | 0.60 |      |      |                 |                 |         | 0.33           | 0.01            |
| 150            | 0.52 |      |      |                 |                 |         | 0.41           | 0.01            |
| 140            | 0.46 |      |      |                 |                 |         | 0.47           |                 |
| 130            | 0.81 |      |      |                 |                 |         | 0.04           | 0.08            |
| 120            | 0.72 |      |      |                 |                 |         | 0.16           | 0.06            |
| 110            | 0.74 |      |      |                 |                 |         | 0.15           | 0.04            |
| 100            | 0.88 | 0.05 |      |                 |                 |         |                |                 |
| 90             | 0.81 | 0.01 |      |                 |                 |         | 0.05           | 0.07            |
| 80             | 0.50 |      |      |                 |                 |         | 0.41           | 0.02            |
| 70             | 0.93 |      |      |                 |                 |         |                | 0.01            |
| 60             | 0.93 |      |      |                 |                 |         |                |                 |
| 50             | 0.93 |      | 0.01 |                 |                 |         |                |                 |
| 40             | 0.81 | 0.01 | 0.11 |                 |                 |         |                |                 |
| 30             | 0.75 | 0.01 | 0.18 |                 |                 |         |                |                 |
| 20             | 0.60 | 0.07 | 0.24 |                 | 0.03            |         |                |                 |
| 10             | 0.56 | 0.04 | 0.31 |                 | 0.03            |         |                |                 |
| 0              | 0.50 | 0.11 | 0.31 |                 | 0.01            |         |                |                 |
| -10            | 0.40 | 0.11 | 0.39 |                 | 0.03            |         |                |                 |
| -20            | 0.39 | 0.12 | 0.36 | 0.01            | 0.06            |         |                |                 |
| -30            | 0.35 | 0.05 | 0.24 | 0.25            | 0.04            |         |                |                 |
| -40            | 0.28 | 0.01 | 0.06 | 0.58            | 0.01            |         |                |                 |
| -50            | 0.27 |      | 0.03 | 0.64            |                 |         |                |                 |
| -60            | 0.27 |      | 0.01 | 0.65            |                 |         |                |                 |
| -70            | 0.30 |      | 0.08 | 0.40            |                 | 0.15    |                |                 |
| -80            | 0.38 | 0.05 | 0.29 | 0.10            |                 | 0.10    |                |                 |
| -90            | 0.54 | 0.20 | 0.13 |                 |                 | 0.06    |                |                 |
| -100           | 0.57 | 0.33 | 0.03 |                 |                 |         |                |                 |

**Table S2.** Secondary structure elements with average  $\Psi$  angle for peptide dimer (16-22) in 10% (w/w) EAM.

| Average $\Psi$ | Coil | Bend | Turn | $\alpha$ -helix | $3_{10}$ -helix | 5-helix | $\beta$ -sheet | $\beta$ -bridge |
|----------------|------|------|------|-----------------|-----------------|---------|----------------|-----------------|
| 180            | 0.77 |      |      |                 |                 |         | 0.11           | 0.06            |
| 170            | 0.72 |      |      |                 |                 |         | 0.16           | 0.05            |
| 160            | 0.76 |      |      |                 |                 |         | 0.16           | 0.02            |
| 150            | 0.65 |      |      |                 |                 |         | 0.26           | 0.03            |
| 140            | 0.30 |      |      |                 |                 |         | 0.63           |                 |
| 130            | 0.43 |      |      |                 |                 |         | 0.50           |                 |
| 120            | 0.50 |      |      |                 |                 |         | 0.43           |                 |
| 110            | 0.27 |      |      |                 |                 |         | 0.66           |                 |
| 100            | 0.31 |      |      |                 |                 |         | 0.62           |                 |
| 90             | 0.43 |      |      |                 |                 |         | 0.50           |                 |
| 80             | 0.51 |      |      |                 |                 |         | 0.40           | 0.02            |
| 70             | 0.80 |      |      |                 |                 |         | 0.08           | 0.05            |
| 60             | 0.89 |      |      |                 |                 |         | 0.01           | 0.03            |
| 50             | 0.90 |      |      |                 |                 |         | 0.01           | 0.02            |
| 40             | 0.89 | 0.01 | 0.04 |                 |                 |         |                |                 |
| 30             | 0.73 | 0.02 | 0.19 |                 |                 |         |                |                 |
| 20             | 0.60 | 0.07 | 0.25 |                 | 0.01            |         |                |                 |
| 10             | 0.45 | 0.03 | 0.44 |                 | 0.04            |         |                |                 |
| 0              | 0.40 | 0.09 | 0.33 | 0.01            | 0.11            |         |                |                 |
| -10            | 0.38 | 0.01 | 0.16 | 0.04            | 0.35            |         |                |                 |
| -20            | 0.31 | 0.01 | 0.20 | 0.27            | 0.16            |         |                |                 |
| -30            | 0.29 |      | 0.11 | 0.52            | 0.02            |         |                |                 |
| -40            | 0.30 |      | 0.05 | 0.58            |                 |         |                |                 |
| -50            | 0.30 |      | 0.05 | 0.56            |                 | 0.03    |                |                 |
| -60            | 0.31 | 0.02 | 0.15 | 0.28            |                 | 0.17    |                |                 |
| -70            | 0.31 | 0.01 | 0.05 | 0.29            |                 | 0.26    |                |                 |
| -80            | 0.32 | 0.02 | 0.19 | 0.02            |                 | 0.38    |                |                 |
| -90            | 0.46 | 0.11 | 0.28 |                 |                 | 0.08    |                |                 |
| -100           | 0.63 | 0.27 | 0.03 |                 |                 |         |                |                 |

**Table S3.** Secondary structure elements with average  $\Psi$  angle for peptide dimer (16-22) in 70% (w/w) EAM.

| Average $\Psi$ | Coil | Bend | Turn | $\alpha$ -helix | $3_{10}$ -helix | 5-helix | $\beta$ -sheet | $\beta$ -bridge |
|----------------|------|------|------|-----------------|-----------------|---------|----------------|-----------------|
| 180            | 0.64 |      |      |                 |                 |         | 0.28           | 0.01            |
| 170            | 0.48 |      |      |                 |                 |         | 0.44           | 0.02            |
| 160            | 0.30 |      |      |                 |                 |         | 0.63           | 0.01            |
| 150            | 0.30 |      |      |                 |                 |         | 0.63           |                 |
| 140            | 0.30 |      |      |                 |                 |         | 0.62           |                 |
| 130            | 0.30 |      |      |                 |                 |         | 0.62           | 0.01            |
| 120            | 0.27 |      |      |                 |                 |         | 0.66           |                 |
| 110            | 0.38 |      |      |                 |                 |         | 0.55           |                 |
| 100            | 0.40 |      |      |                 |                 |         | 0.53           |                 |
| 90             | 0.60 |      |      |                 |                 |         | 0.33           |                 |
| 80             | 0.67 |      |      |                 |                 |         | 0.25           | 0.02            |
| 70             | 0.83 |      |      |                 |                 |         | 0.06           | 0.04            |
| 60             | 0.93 |      |      |                 |                 |         |                |                 |
| 50             | 0.93 |      |      |                 |                 |         |                |                 |
| 40             | 0.93 |      |      |                 |                 |         |                |                 |
| 30             | 0.93 |      |      |                 |                 |         |                |                 |
| 20             | 0.90 |      | 0.03 |                 |                 |         |                |                 |
| 10             | 0.62 | 0.04 | 0.26 |                 | 0.02            |         |                |                 |
| 0              | 0.48 | 0.02 | 0.28 |                 | 0.16            |         |                |                 |
| -10            | 0.39 | 0.03 | 0.29 | 0.01            | 0.20            |         |                |                 |
| -20            | 0.39 | 0.08 | 0.19 | 0.22            | 0.05            |         |                |                 |
| -30            | 0.31 |      | 0.23 | 0.30            | 0.08            |         |                |                 |
| -40            | 0.28 |      | 0.03 | 0.62            |                 |         |                |                 |
| -50            | 0.28 |      | 0.01 | 0.64            |                 |         |                |                 |
| -60            | 0.27 |      |      | 0.66            |                 |         |                |                 |
| -70            | 0.32 |      | 0.13 | 0.40            |                 | 0.08    |                |                 |
| -80            | 0.34 |      | 0.28 | 0.30            |                 | 0.01    |                |                 |
| -90            | 0.41 | 0.08 | 0.13 | 0.27            |                 | 0.03    |                |                 |
| -100           | 0.49 | 0.15 | 0.13 |                 |                 | 0.16    |                |                 |

**Table S4.** Secondary structure elements with average  $\Psi$  angle for peptide dimer (16-22) in 10% (w/w) EAN.

| Average $\Psi$ | Coil | Bend | Turn | $\alpha$ -helix | $3_{10}$ -helix | 5-helix | $\beta$ -sheet | $\beta$ -bridge |
|----------------|------|------|------|-----------------|-----------------|---------|----------------|-----------------|
| 180            | 0.75 |      |      |                 |                 |         | 0.15           | 0.03            |
| 170            | 0.59 |      |      |                 |                 |         | 0.33           | 0.01            |
| 160            | 0.57 |      |      |                 |                 |         | 0.36           | 0.01            |
| 150            | 0.56 |      |      |                 |                 |         | 0.37           |                 |
| 140            | 0.39 |      |      |                 |                 |         | 0.54           |                 |
| 130            | 0.52 |      |      |                 |                 |         | 0.41           |                 |
| 120            | 0.63 |      |      |                 |                 |         | 0.30           |                 |
| 110            | 0.53 |      |      |                 |                 |         | 0.40           |                 |
| 100            | 0.61 |      |      |                 |                 |         | 0.32           |                 |
| 90             | 0.70 |      |      |                 |                 |         | 0.24           |                 |
| 80             | 0.53 |      |      |                 |                 |         | 0.37           | 0.03            |
| 70             | 0.75 |      |      |                 |                 |         | 0.12           | 0.07            |
| 60             | 0.89 |      |      |                 |                 |         | 0.01           | 0.03            |
| 50             | 0.92 |      |      |                 |                 |         |                | 0.01            |
| 40             | 0.93 |      | 0.01 |                 |                 |         |                |                 |
| 30             | 0.73 | 0.10 | 0.10 |                 |                 |         |                |                 |
| 20             | 0.61 | 0.04 | 0.29 |                 |                 |         |                |                 |
| 10             | 0.52 | 0.08 | 0.33 |                 |                 |         |                |                 |
| 0              | 0.50 | 0.14 | 0.30 |                 |                 |         |                |                 |
| -10            | 0.42 | 0.16 | 0.22 | 0.02            | 0.11            |         |                |                 |
| -20            | 0.45 | 0.19 | 0.29 |                 |                 |         |                |                 |
| -30            | 0.40 | 0.20 | 0.20 | 0.12            | 0.01            |         |                |                 |
| -40            | 0.36 | 0.11 | 0.13 | 0.32            |                 | 0.01    |                |                 |
| -50            | 0.29 |      | 0.01 | 0.63            |                 |         |                |                 |
| -60            | 0.28 |      | 0.01 | 0.61            |                 | 0.05    |                |                 |
| -70            | 0.42 | 0.13 | 0.19 | 0.13            |                 | 0.06    |                |                 |
| -80            | 0.50 | 0.24 | 0.11 | 0.01            |                 | 0.07    |                |                 |
| -90            | 0.60 | 0.24 | 0.09 |                 |                 |         |                |                 |
| -100           | 0.63 | 0.29 | 0.01 |                 |                 |         |                |                 |

**Table S5.** Secondary structure elements with average  $\Psi$  angle for peptide dimer (16-22) in 70% (w/w) EAN.

| Average $\Psi$ | Coil | Bend | Turn | $\alpha$ -helix | $3_{10}$ -helix | 5-helix | $\beta$ -sheet | $\beta$ -bridge |
|----------------|------|------|------|-----------------|-----------------|---------|----------------|-----------------|
| 180            | 0.54 |      |      |                 |                 |         | 0.39           | 0.01            |
| 170            | 0.40 |      |      |                 |                 |         | 0.53           | 0.01            |
| 160            | 0.43 |      |      |                 |                 |         | 0.48           | 0.02            |
| 150            | 0.39 |      |      |                 |                 |         | 0.54           |                 |
| 140            | 0.28 |      |      |                 |                 |         | 0.65           |                 |
| 130            | 0.27 |      |      |                 |                 |         | 0.67           |                 |
| 120            | 0.28 |      |      |                 |                 |         | 0.66           |                 |
| 110            | 0.28 |      |      |                 |                 |         | 0.66           |                 |
| 100            | 0.34 |      |      |                 |                 |         | 0.59           |                 |
| 90             | 0.45 |      |      |                 |                 |         | 0.48           |                 |
| 80             | 0.58 |      |      |                 |                 |         | 0.33           | 0.03            |
| 70             | 0.78 |      |      |                 |                 |         | 0.12           | 0.03            |
| 60             | 0.93 |      |      |                 |                 |         |                |                 |
| 50             | 0.93 |      |      |                 |                 |         |                |                 |
| 40             | 0.91 | 0.03 |      |                 |                 |         |                |                 |
| 30             | 0.88 | 0.05 | 0.01 |                 |                 |         |                |                 |
| 20             | 0.61 | 0.09 | 0.22 |                 | 0.01            |         |                |                 |
| 10             | 0.48 | 0.08 | 0.30 |                 | 0.07            |         |                |                 |
| 0              | 0.48 | 0.05 | 0.32 |                 | 0.09            |         |                |                 |
| -10            | 0.48 | 0.02 | 0.28 |                 | 0.15            |         |                |                 |
| -20            | 0.48 | 0.03 | 0.41 |                 | 0.02            |         |                |                 |
| -30            | 0.48 |      | 0.35 | 0.10            |                 |         |                |                 |
| -40            | 0.44 |      | 0.26 | 0.23            |                 |         |                |                 |
| -50            | 0.40 |      | 0.21 | 0.33            |                 |         |                |                 |
| -60            | 0.40 |      | 0.20 | 0.33            |                 |         |                |                 |
| -70            | 0.44 |      | 0.20 | 0.29            |                 |         |                |                 |
| -80            | 0.55 | 0.09 | 0.20 | 0.09            |                 |         |                |                 |
| -90            | 0.58 | 0.12 | 0.23 |                 |                 |         |                |                 |
| -100           | 0.56 | 0.16 | 0.21 |                 |                 |         |                |                 |

**Table S6.** Secondary structure elements with average  $\Psi$  angle for peptide dimer (16-22) in 10% (w/w) TEAM.

| Average $\Psi$ | Coil | Bend | Turn | $\alpha$ -helix | $3_{10}$ -helix | 5-helix | $\beta$ -sheet | $\beta$ -bridge |
|----------------|------|------|------|-----------------|-----------------|---------|----------------|-----------------|
| 180            | 0.86 |      |      |                 |                 |         | 0.02           | 0.06            |
| 170            | 0.68 |      |      |                 |                 |         | 0.24           | 0.01            |
| 160            | 0.41 |      |      |                 |                 |         | 0.52           |                 |
| 150            | 0.37 |      |      |                 |                 |         | 0.56           | 0.01            |
| 140            | 0.31 |      |      |                 |                 |         | 0.62           |                 |
| 130            | 0.69 |      |      |                 |                 |         | 0.21           | 0.03            |
| 120            | 0.81 |      |      |                 |                 |         | 0.01           | 0.12            |
| 110            | 0.82 | 0.06 |      |                 |                 |         |                | 0.05            |
| 100            | 0.84 | 0.08 | 0.01 |                 |                 |         |                | 0.01            |
| 90             | 0.81 | 0.04 | 0.03 |                 |                 |         |                | 0.06            |
| 80             | 0.73 | 0.04 | 0.08 |                 |                 |         |                | 0.08            |
| 70             | 0.88 | 0.05 |      |                 |                 |         |                |                 |
| 60             | 0.82 | 0.08 | 0.03 |                 |                 |         |                |                 |
| 50             | 0.80 | 0.08 | 0.05 |                 |                 |         |                |                 |
| 40             | 0.80 | 0.07 | 0.06 |                 |                 |         |                |                 |
| 30             | 0.67 | 0.17 | 0.09 |                 |                 |         |                |                 |
| 20             | 0.60 | 0.17 | 0.16 |                 |                 |         |                |                 |
| 10             | 0.59 | 0.13 | 0.20 |                 | 0.01            |         |                |                 |
| 0              | 0.54 | 0.10 | 0.27 |                 | 0.02            |         |                |                 |
| -10            | 0.47 | 0.12 | 0.15 | 0.01            | 0.18            |         |                |                 |
| -20            | 0.44 | 0.16 | 0.14 | 0.08            | 0.11            |         |                |                 |
| -30            | 0.42 | 0.13 | 0.12 | 0.23            | 0.03            |         |                |                 |
| -40            | 0.47 | 0.06 | 0.10 | 0.30            |                 |         |                |                 |
| -50            | 0.50 | 0.08 | 0.06 | 0.29            |                 |         |                |                 |
| -60            | 0.55 | 0.08 | 0.14 | 0.06            |                 | 0.11    |                |                 |
| -70            | 0.46 | 0.12 | 0.06 | 0.01            |                 | 0.29    |                |                 |
| -80            | 0.37 | 0.09 | 0.24 |                 |                 | 0.23    |                |                 |
| -90            | 0.60 | 0.28 | 0.06 |                 |                 |         |                |                 |
| -100           | 0.62 | 0.30 | 0.01 |                 |                 |         |                |                 |

**Table S7.** Secondary structure elements with average  $\Psi$  angle for peptide dimer (16-22) in 70% (w/w) TEAM.

| Average $\Psi$ | Coil | Bend | Turn | $\alpha$ -helix | 3 <sub>10</sub> -helix | 5-helix | $\beta$ -sheet | $\beta$ -bridge |
|----------------|------|------|------|-----------------|------------------------|---------|----------------|-----------------|
| 180            | 0.50 |      |      |                 |                        |         | 0.42           | 0.02            |
| 170            | 0.42 |      |      |                 |                        |         | 0.51           | 0.01            |
| 160            | 0.44 |      |      |                 |                        |         | 0.49           |                 |
| 150            | 0.30 |      |      |                 |                        |         | 0.63           |                 |
| 140            | 0.27 |      |      |                 |                        |         | 0.66           |                 |
| 130            | 0.29 |      |      |                 |                        |         | 0.64           |                 |
| 120            | 0.27 |      |      |                 |                        |         | 0.67           |                 |
| 110            | 0.27 |      |      |                 |                        |         | 0.66           |                 |
| 100            | 0.27 |      |      |                 |                        |         | 0.66           |                 |
| 90             | 0.32 |      |      |                 |                        |         | 0.61           |                 |
| 80             | 0.49 |      |      |                 |                        |         | 0.42           | 0.02            |
| 70             | 0.79 |      |      |                 |                        |         | 0.10           | 0.04            |
| 60             | 0.93 |      |      |                 |                        |         |                |                 |
| 50             | 0.93 |      |      |                 |                        |         |                |                 |
| 40             | 0.93 |      |      |                 |                        |         |                |                 |
| 30             | 0.91 |      | 0.02 |                 |                        |         |                |                 |
| 20             | 0.92 |      | 0.02 |                 |                        |         |                |                 |
| 10             | 0.61 | 0.04 | 0.21 |                 | 0.07                   |         |                |                 |
| 0              | 0.53 |      | 0.21 |                 | 0.19                   |         |                |                 |
| -10            | 0.48 | 0.05 | 0.10 |                 | 0.31                   |         |                |                 |
| -20            | 0.45 | 0.07 | 0.10 |                 | 0.32                   |         |                |                 |
| -30            | 0.40 | 0.01 | 0.24 |                 | 0.29                   |         |                |                 |
| -40            | 0.40 |      | 0.25 | 0.17            | 0.11                   |         |                |                 |
| -50            | 0.40 |      | 0.21 | 0.33            |                        |         |                |                 |
| -60            | 0.41 | 0.01 | 0.18 | 0.33            |                        |         |                |                 |
| -70            | 0.40 |      | 0.20 | 0.33            |                        |         |                |                 |
| -80            | 0.42 | 0.04 | 0.14 | 0.33            |                        |         |                |                 |
| -90            | 0.47 | 0.13 | 0.04 | 0.29            |                        |         |                |                 |
| -100           | 0.53 | 0.14 | 0.24 |                 | 0.03                   |         |                |                 |

**Table S8.** Coordination numbers of water oxygen atoms, anion oxygen atoms around each amide hydrogen and water hydrogens, cation hydrogens around each amide oxygen of peptide dimer (16-22) in water, 10% and 70% (w/w) EAM, EAN and TEAM IL.

| System | RDF                | 10% (w/w) IL    |                | 70% (w/w) IL    |                |
|--------|--------------------|-----------------|----------------|-----------------|----------------|
|        |                    | $\alpha$ -helix | $\beta$ -sheet | $\alpha$ -helix | $\beta$ -sheet |
| Water  | Amide H – Water O  | 0.39            | 0.85 (Coil)    | –               | –              |
|        | Amide O – Water H  | 1.12            | 1.57 (Coil)    | –               | –              |
| EAM    | Amide H – Water O  | 0.03            | 0.42           | 0.153           | 0.16           |
|        | Amide H – Anion O  | 0.54            | 0.13           | 0.39            | 0.56           |
|        | Amide O – Cation H | 0.05            | 0.03           | 0.16            | 0.43           |
|        | Amide O – Water H  | 1.19            | 1.13           | 0.80            | 0.40           |
| EAN    | Amide H – Water O  | 0.21            | 0.40           | 0.12            | 0.15           |
|        | Amide H – Anion O  | 0.52            | 0.19           | 0.73            | 0.54           |
|        | Amide O – Cation H | 0.09            | 0.04           | 0.35            | 0.42           |
|        | Amide O – Water H  | 1.11            | 1.18           | 0.67            | 0.48           |
| TEAM   | Amide H – Water O  | 0.34            | 0.45           | 0.11            | 0.27           |
|        | Amide H – Anion O  | 0.34            | 0.12           | 0.25            | 0.23           |
|        | Amide O – Cation H | 0.01            | 0.001          | 0.08            | 0.04           |
|        | Amide O – Water H  | 1.35            | 1.16           | 0.60            | 0.67           |



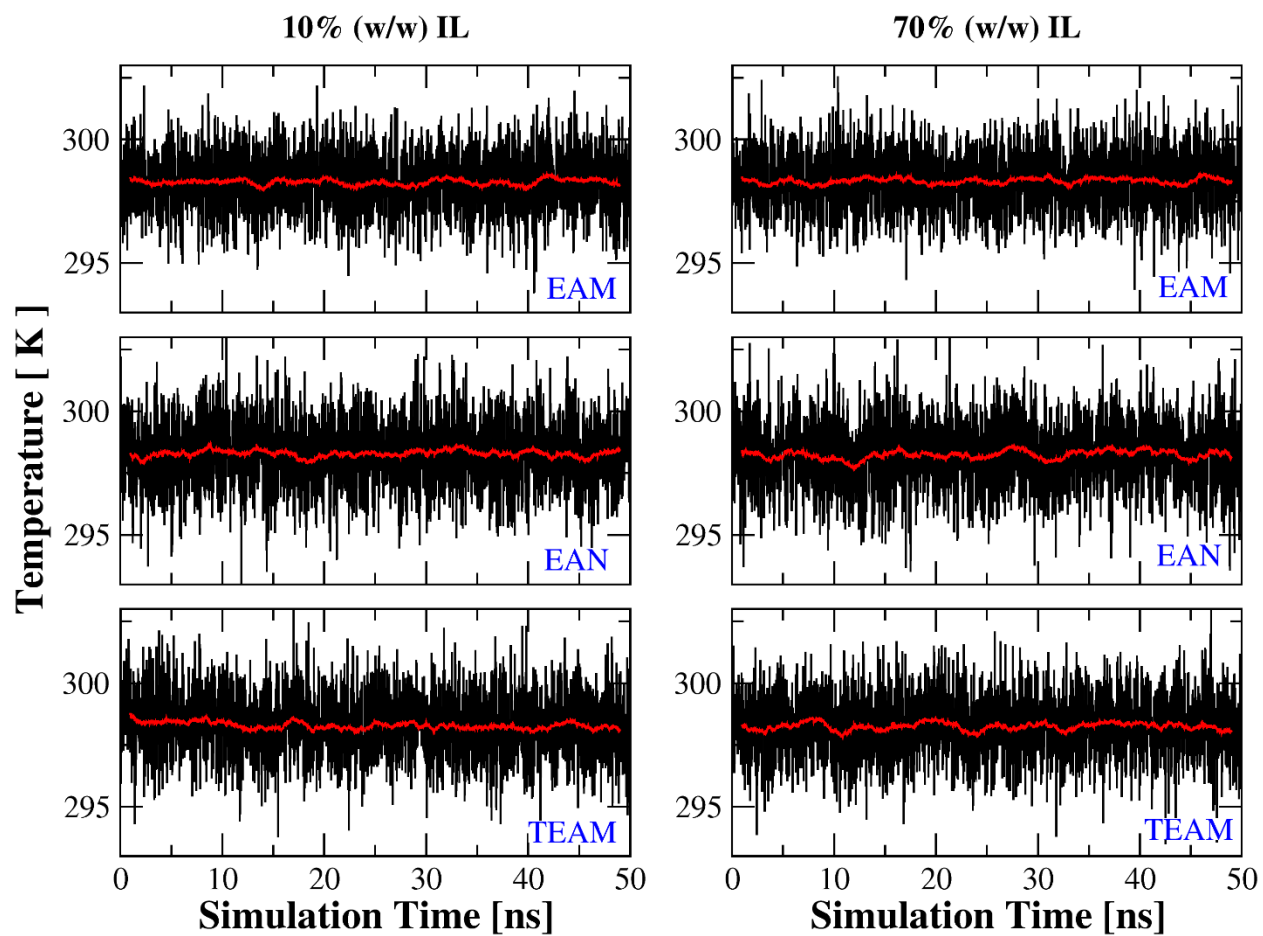

**Figure S1.** Temperature of the system along the equilibrium simulation of 50 ns with running average for 10 and 70% (w/w) EAM, EAN and TEAM ILs.

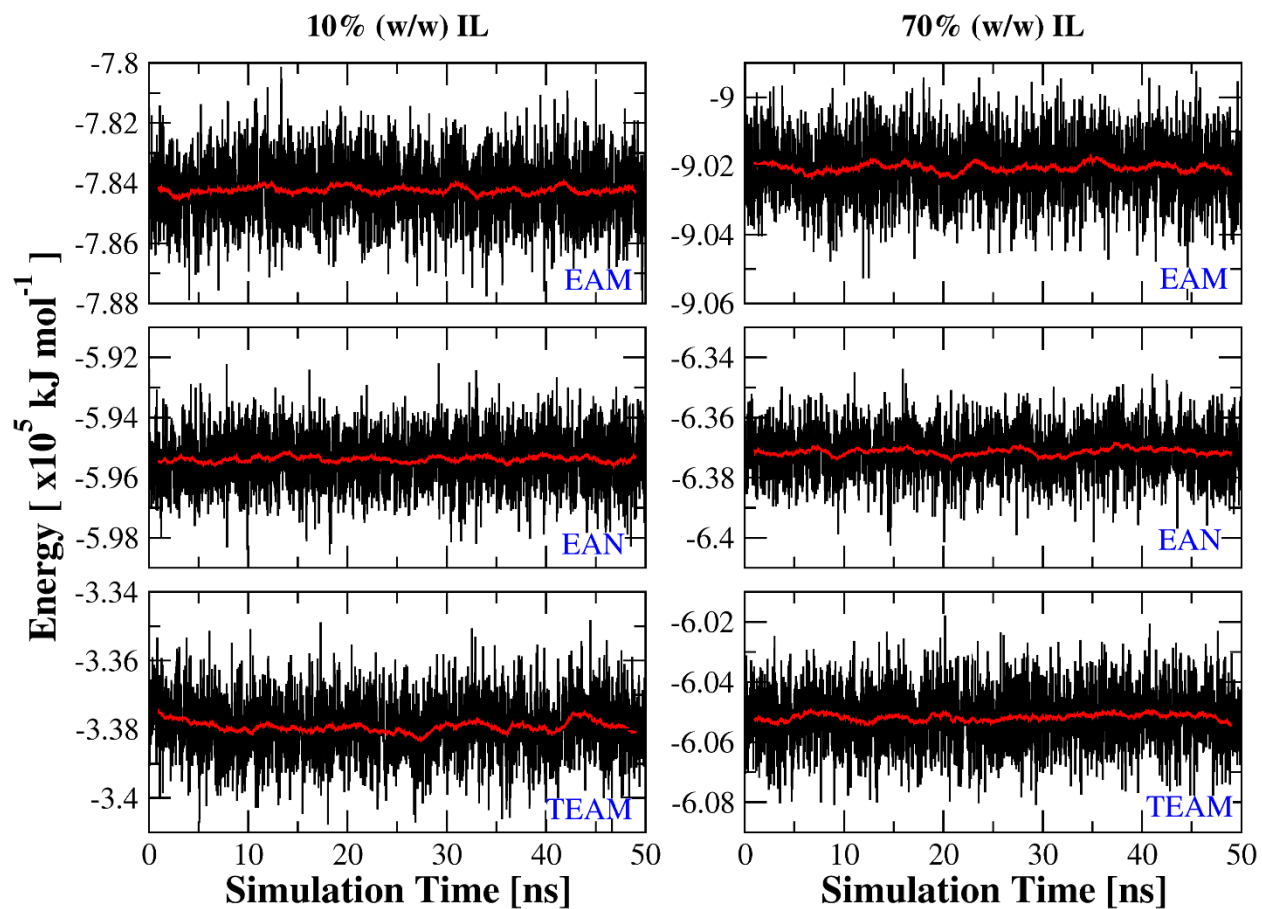

**Figure S2.** Total energy of the system along the equilibrium simulation of 50 ns with running average for 10 and 70% (w/w) EAM, EAN and TEAM ILs.

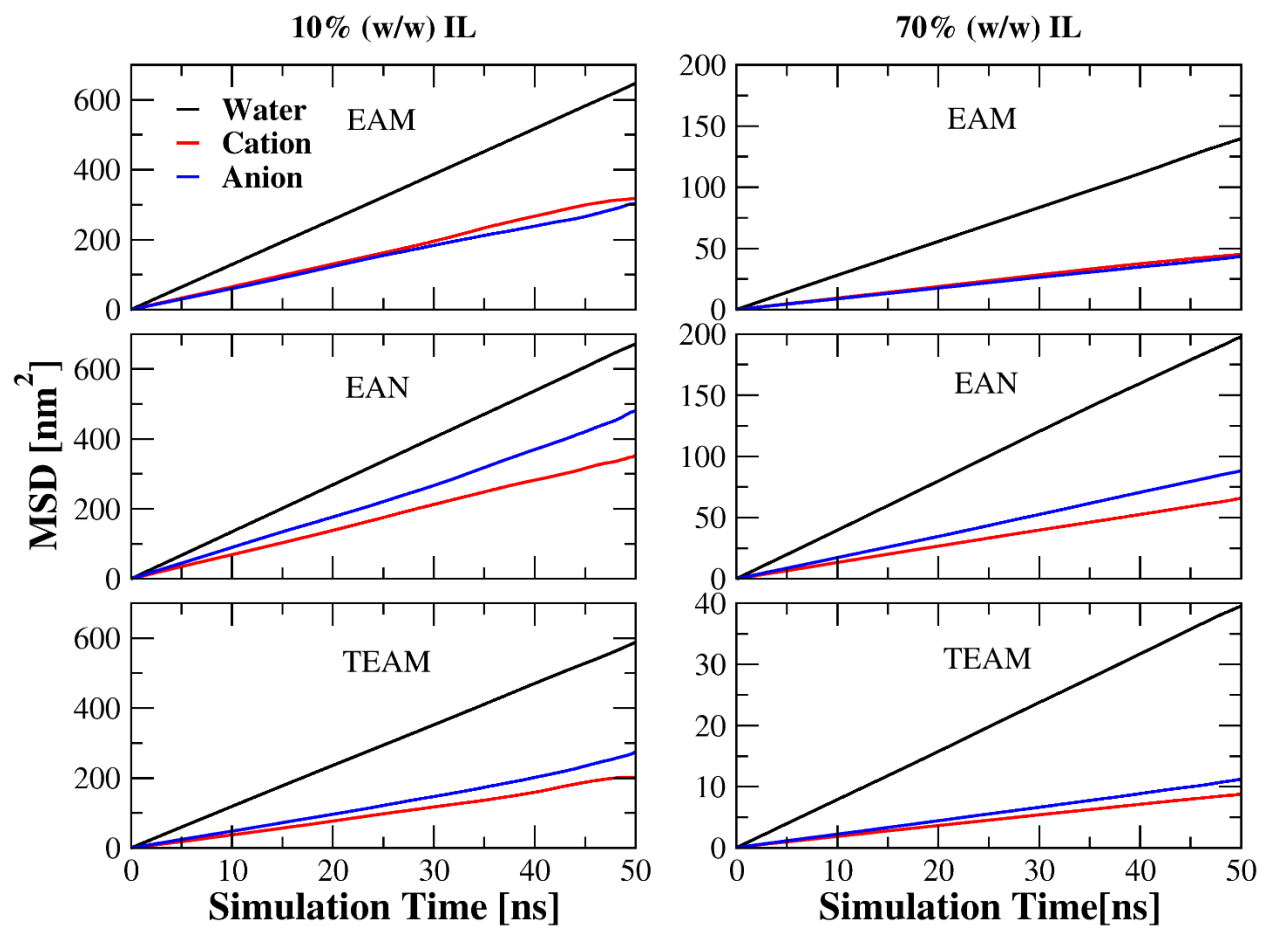

**Figure S3.** Mean squared displacement of water, cation and anion along the equilibration of 50 ns in 10 and 70% (w/w) EAM, EAN and TEAM ILs.

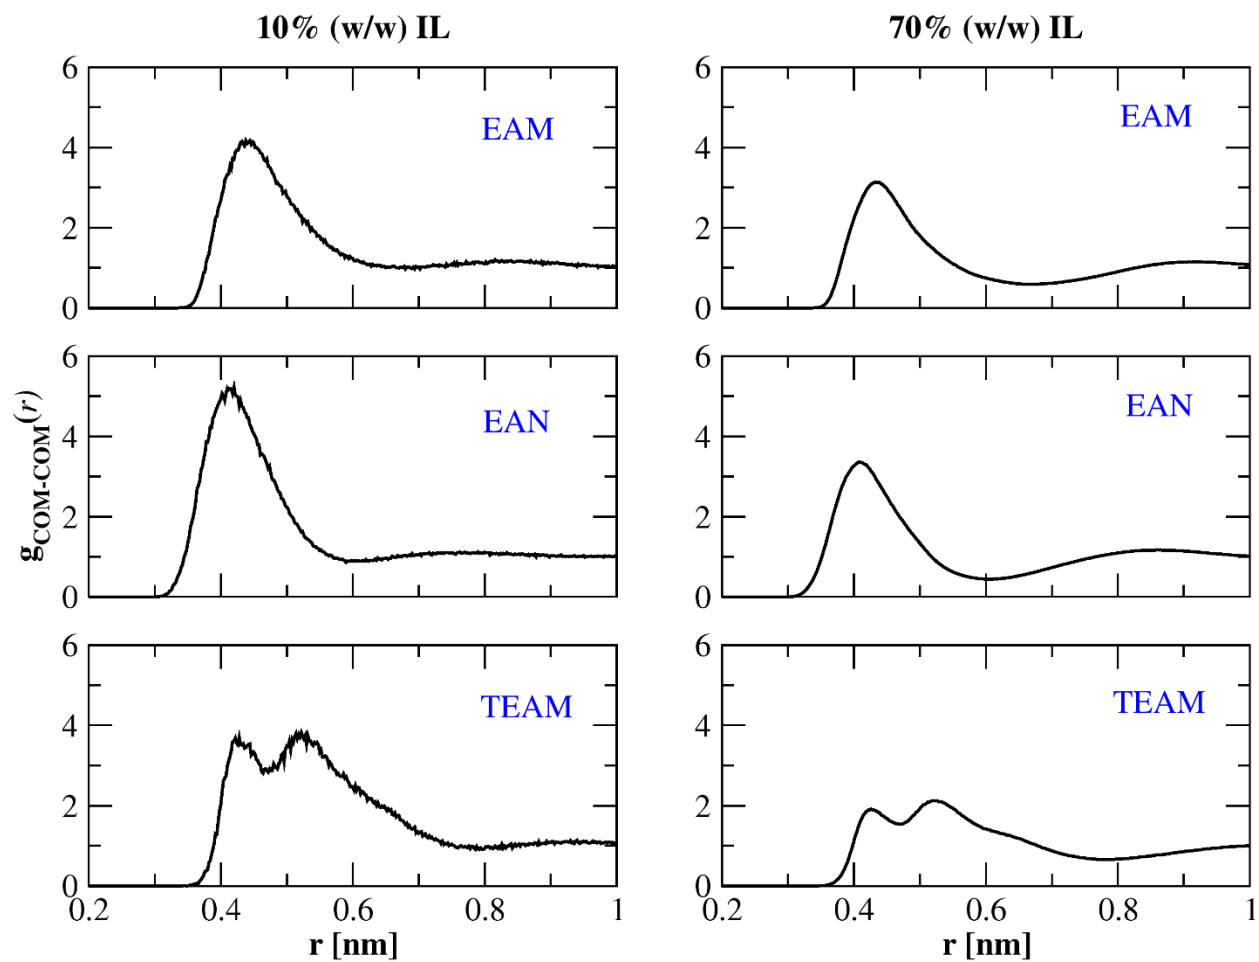

**Figure S4.** COM-COM radial distribution functions of anion around cation in 10 and 70% (w/w) EAM, EAN and TEAM IL.

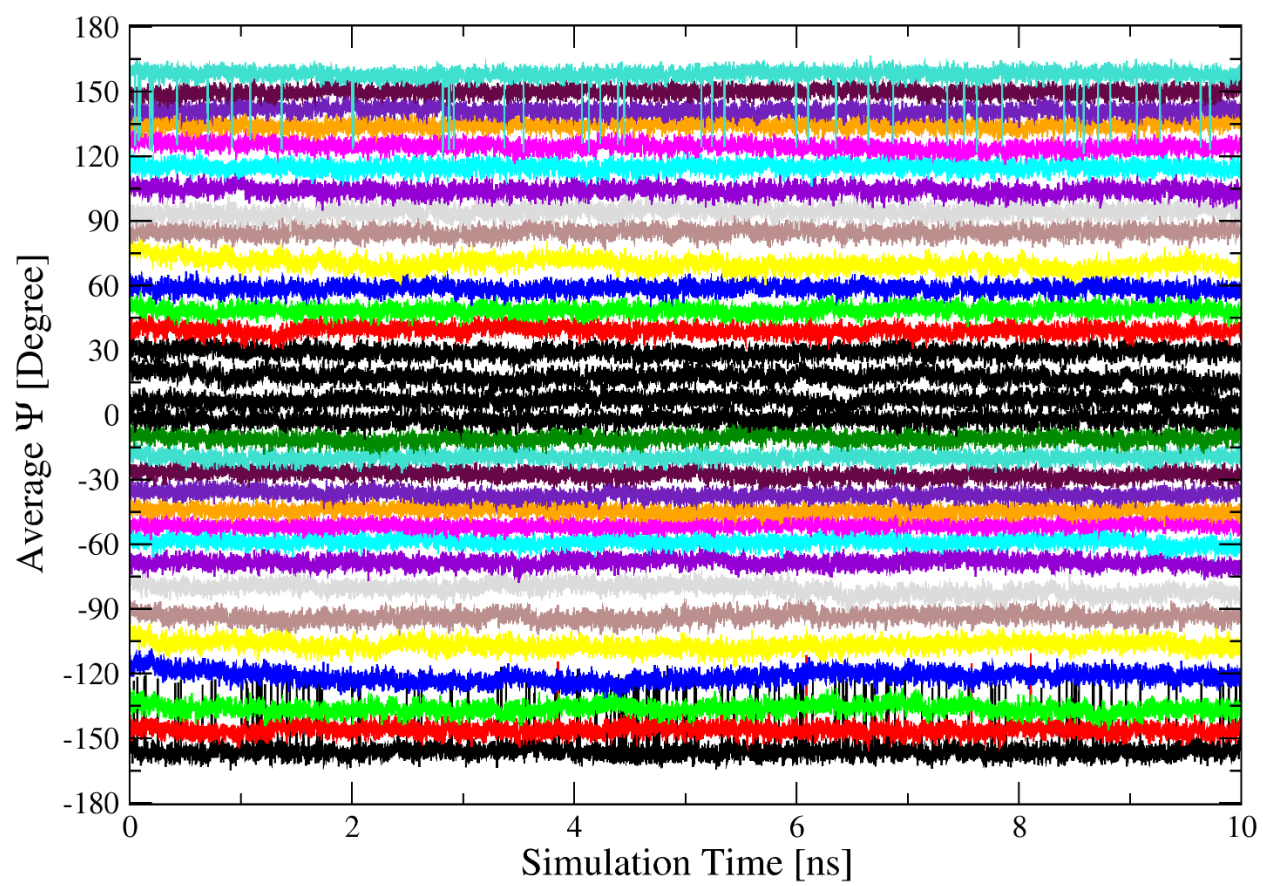

**Figure S5.** Average  $\Psi$  angle along with the simulation time for peptide dimer in water.

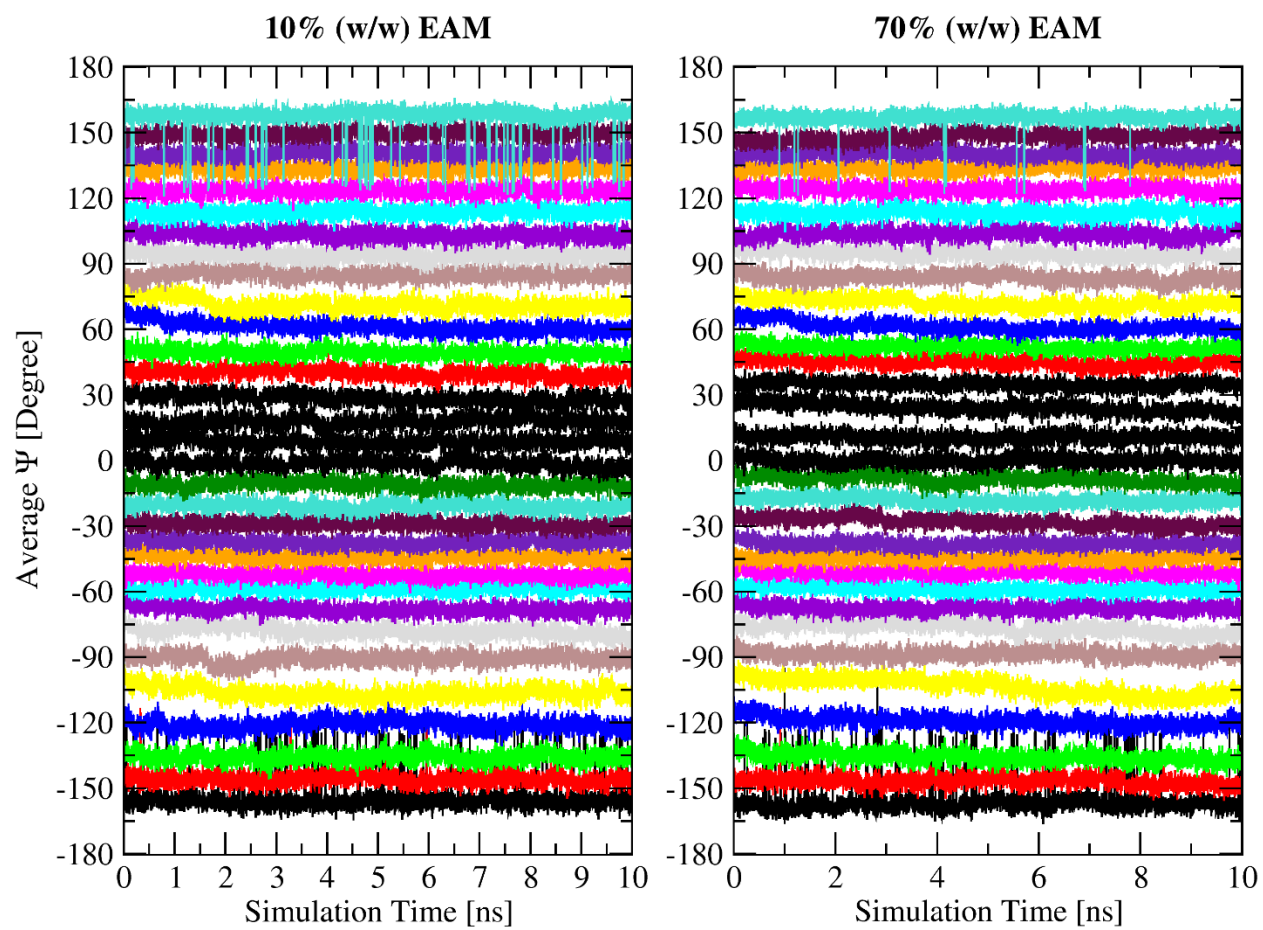

Figure S6. Average  $\Psi$  angle along with the simulation time for peptide dimer in 10% and 70% (w/w) EAM IL.

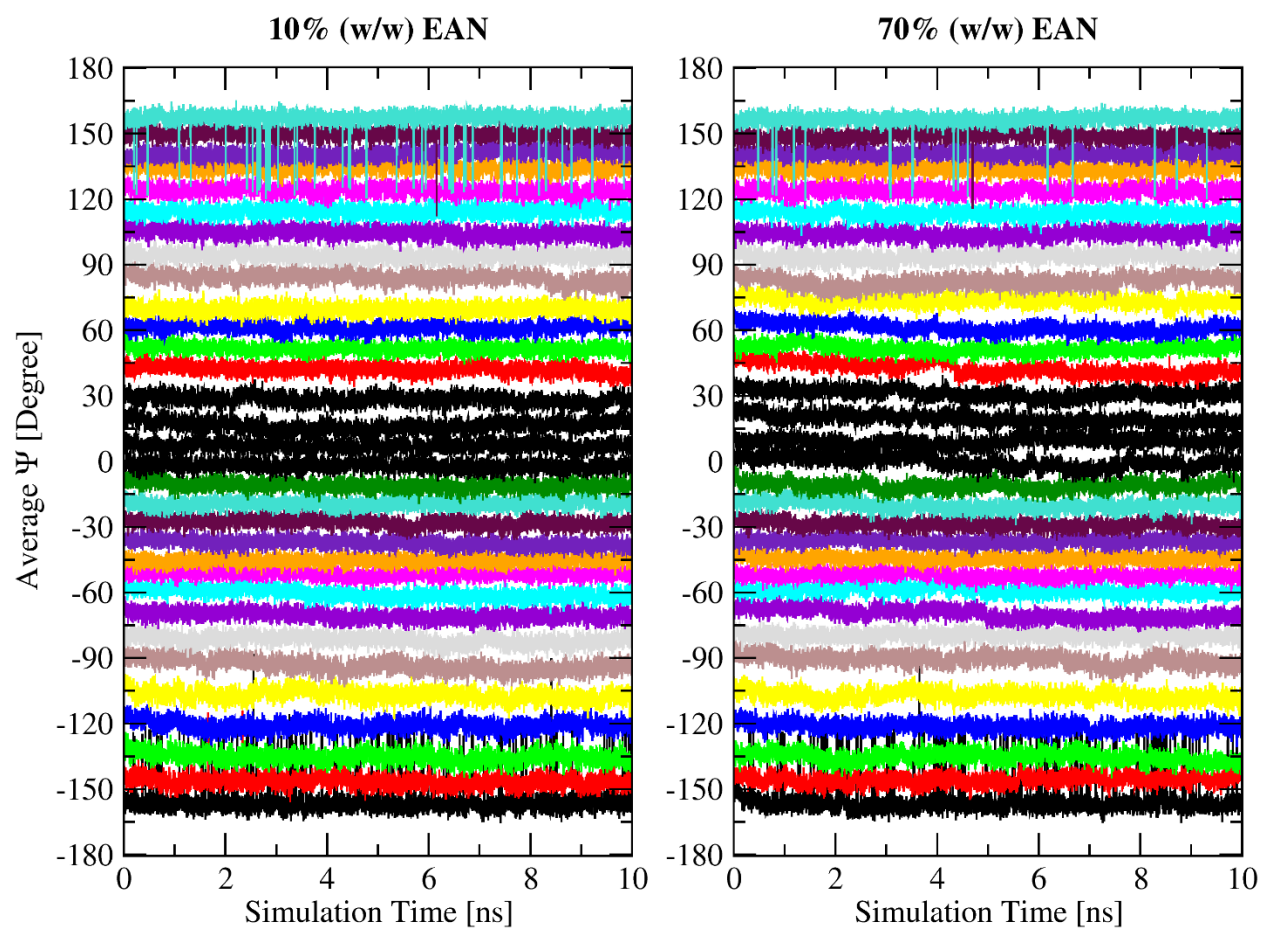

**Figure S7.** Average  $\Psi$  angle along with the simulation time for peptide dimer in 10% and 70% (w/w) EAN IL.

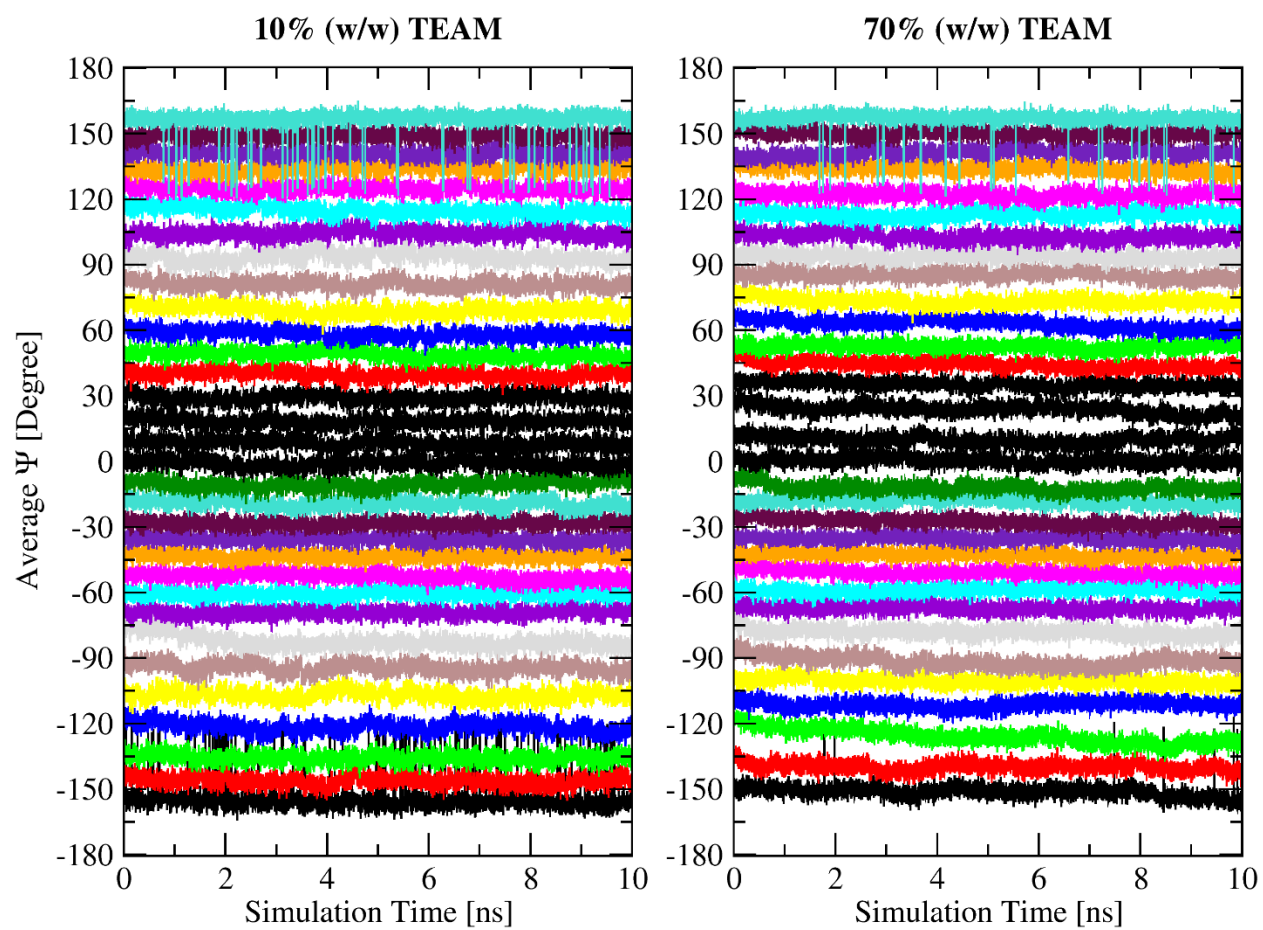

**Figure S8.** Average  $\Psi$  angle along with the simulation time for peptide dimer in 10% and 70% (w/w) TEAM IL.



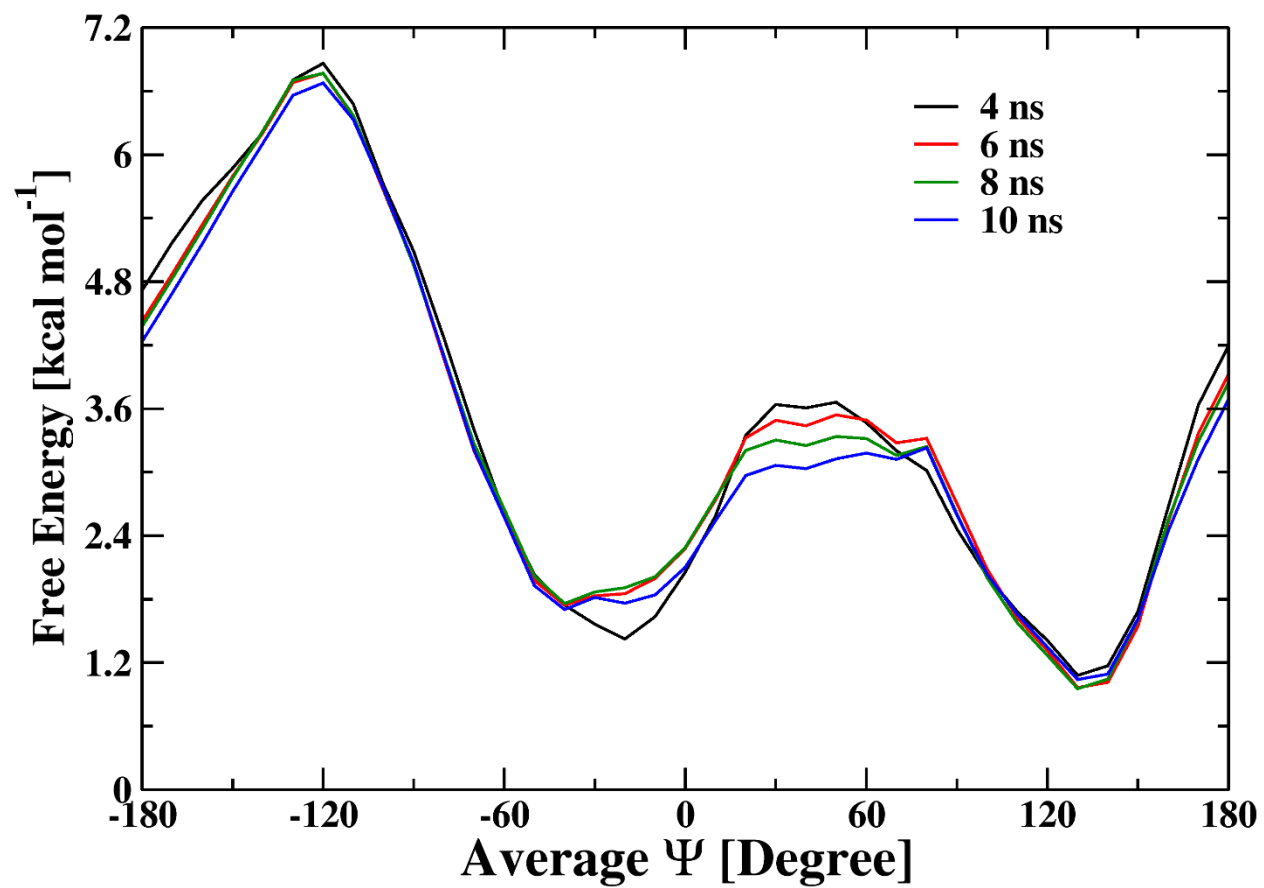

Figure S9. Convergence of the free energy profile with simulation time for peptide dimer in water.

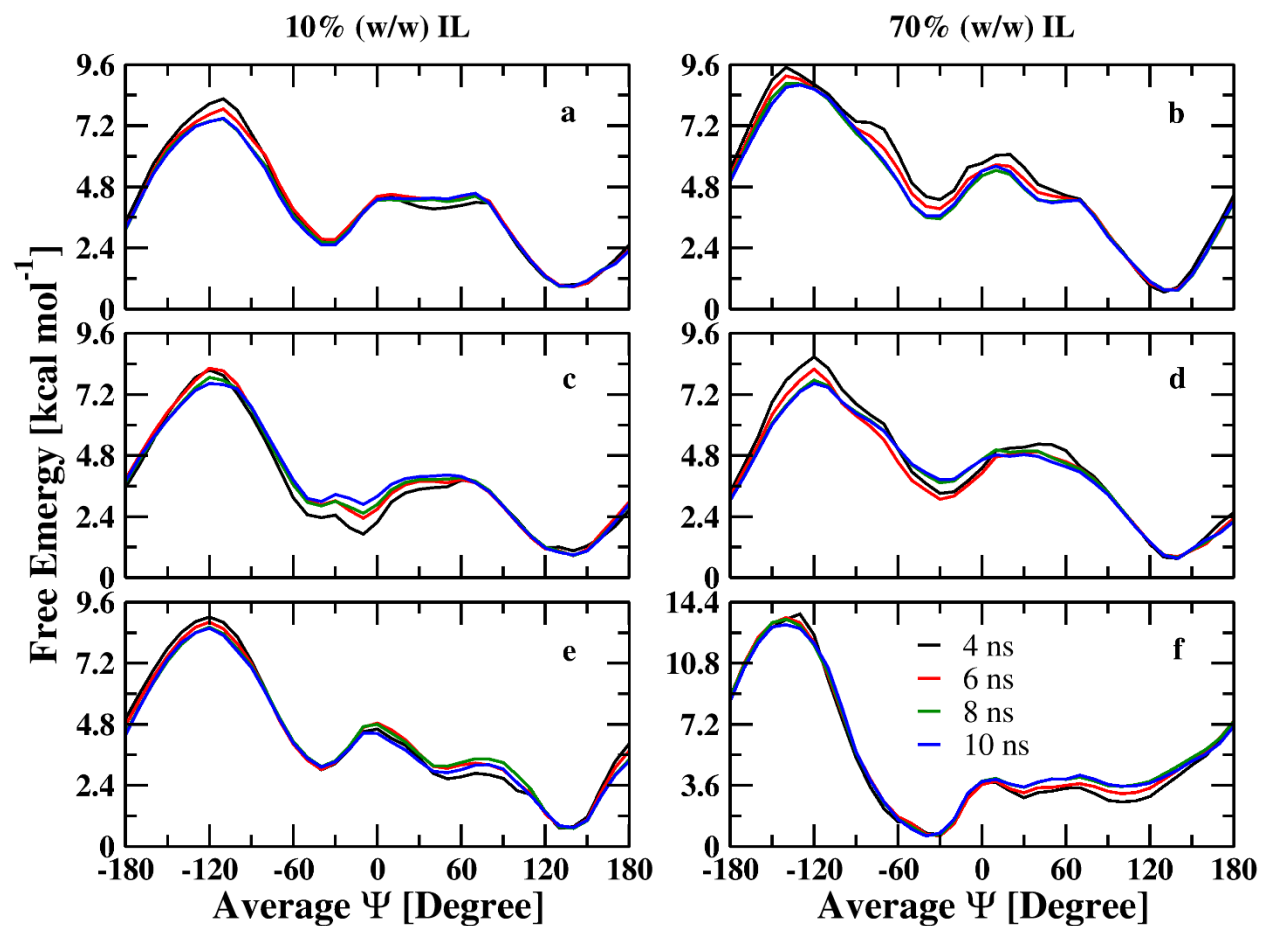

**Figure S10.** Convergence of the free energy profile with simulation time for peptide dimer in 10 and 70% (w/w) EAM (a, b), EAN (c, d) and TEAM (e, f) ILs.

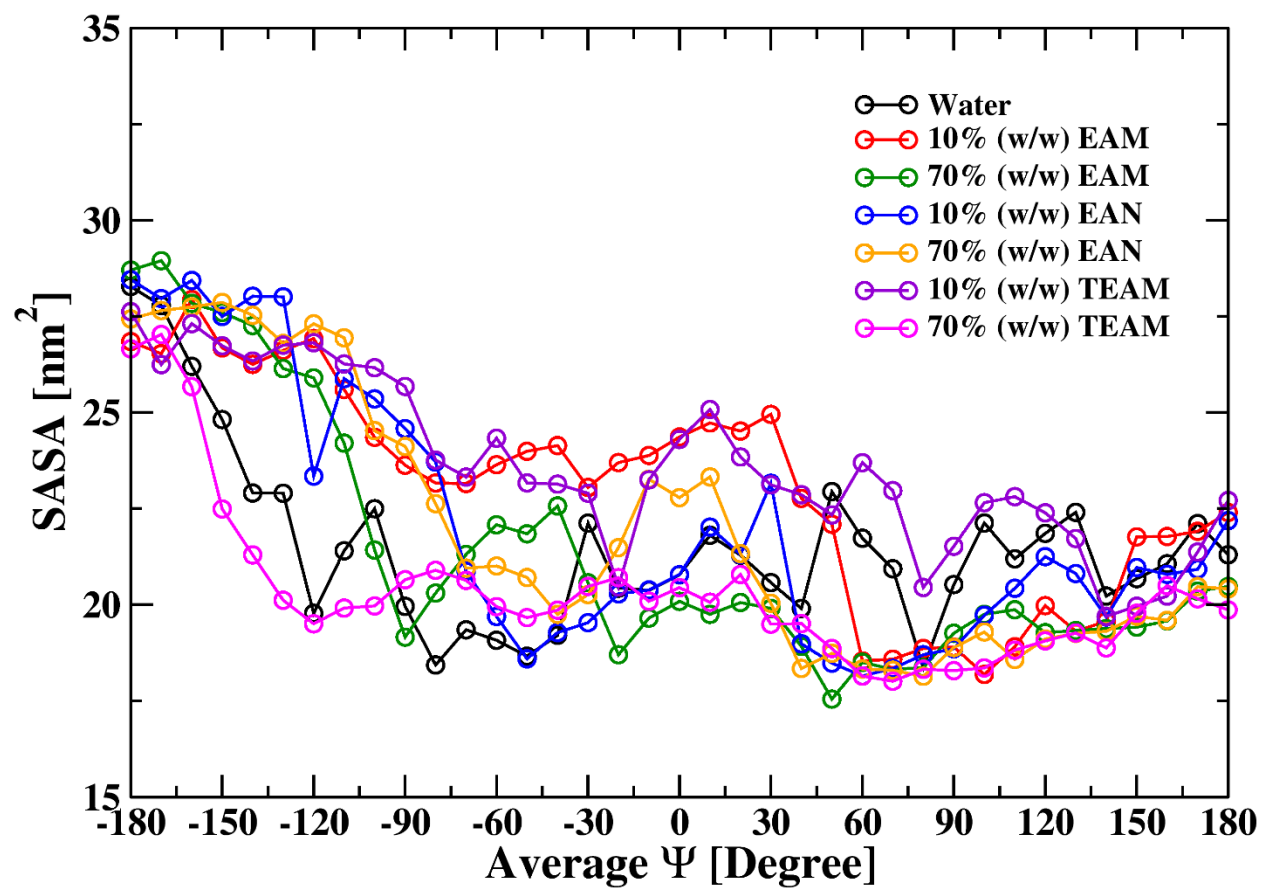

**Figure S11.** The solvent-accessible surface area of the peptide dimer with changing average  $\Psi$  angle in water, 10% and 70% (w/w) EAM, EAN and TEAM IL.

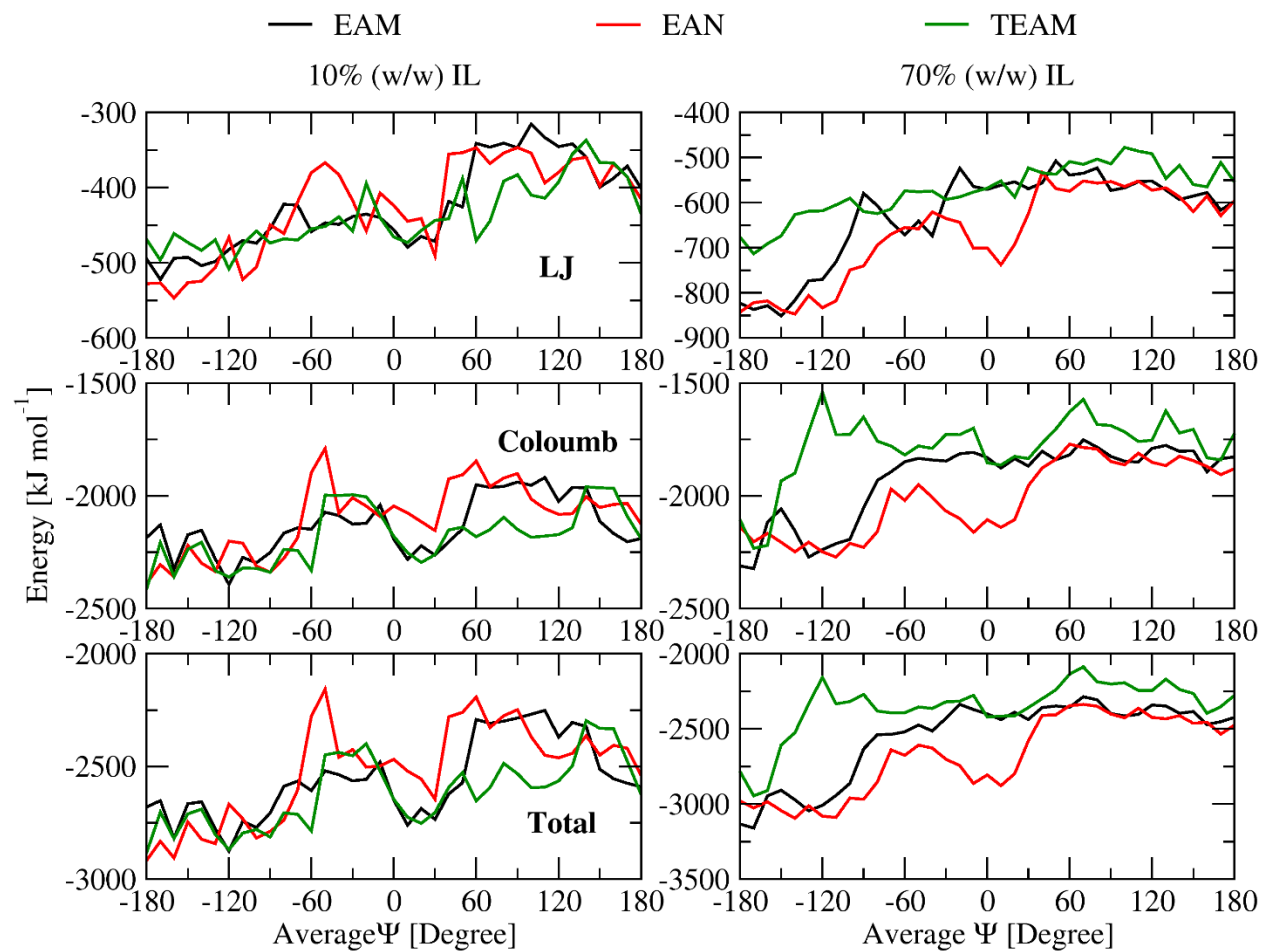

**Figure S12.** vdWs, Coulomb and total interaction energies between peptide and solvent with average  $\Psi$  angle in 10% and 70% (w/w) EAM, EAN and TEAM IL.

**Optimized coordinates of Ethylammonium (EA), Triethylammonium (TEA), Mesylate and Nitrate ions.**

**Ethylammonium**

| Atom | x     | y     | z     |
|------|-------|-------|-------|
| C1   | 0.425 | 0.199 | 0.189 |
| H1   | 0.430 | 0.136 | 0.278 |
| H2   | 0.514 | 0.262 | 0.189 |
| H3   | 0.430 | 0.136 | 0.100 |
| C2   | 0.302 | 0.287 | 0.189 |
| H4   | 0.296 | 0.350 | 0.101 |
| H5   | 0.296 | 0.350 | 0.278 |
| N1   | 0.173 | 0.202 | 0.189 |
| H6   | 0.115 | 0.220 | 0.272 |
| H7   | 0.115 | 0.221 | 0.107 |
| H8   | 0.195 | 0.102 | 0.189 |

**Triethylammonium**

| Atom | x     | y     | z     |
|------|-------|-------|-------|
| C2   | 0.243 | 0.190 | 0.202 |
| H4   | 0.170 | 0.118 | 0.241 |
| H5   | 0.191 | 0.253 | 0.130 |
| H6   | 0.320 | 0.132 | 0.150 |
| C1   | 0.298 | 0.268 | 0.319 |
| H2   | 0.344 | 0.202 | 0.393 |
| H3   | 0.220 | 0.325 | 0.370 |
| N1   | 0.407 | 0.369 | 0.283 |
| H1   | 0.434 | 0.413 | 0.371 |
| C5   | 0.359 | 0.481 | 0.193 |
| H12  | 0.448 | 0.539 | 0.167 |
| H13  | 0.322 | 0.435 | 0.102 |
| C6   | 0.255 | 0.570 | 0.258 |
| H14  | 0.234 | 0.654 | 0.192 |
| H15  | 0.160 | 0.519 | 0.276 |
| H16  | 0.290 | 0.612 | 0.353 |
| C3   | 0.532 | 0.302 | 0.228 |
| H7   | 0.539 | 0.205 | 0.278 |
| H8   | 0.514 | 0.283 | 0.122 |
| C4   | 0.657 | 0.384 | 0.252 |
| H9   | 0.743 | 0.328 | 0.215 |
| H10  | 0.656 | 0.480 | 0.200 |
| H11  | 0.674 | 0.402 | 0.358 |

**Mesylate**

| Atom | x     | y     | z     |
|------|-------|-------|-------|
| C1   | 0.135 | 0.221 | 0.220 |
| H1   | 0.100 | 0.297 | 0.150 |
| H2   | 0.100 | 0.243 | 0.321 |
| H3   | 0.100 | 0.122 | 0.189 |
| S1   | 0.317 | 0.221 | 0.220 |
| O2   | 0.354 | 0.357 | 0.264 |
| O3   | 0.354 | 0.190 | 0.081 |
| O1   | 0.354 | 0.115 | 0.317 |

**Nitrate**

| Atom | x     | y     | z     |
|------|-------|-------|-------|
| O1   | 0.100 | 0.132 | 0.318 |
| N1   | 0.100 | 0.195 | 0.209 |
| O3   | 0.100 | 0.321 | 0.209 |
| O2   | 0.100 | 0.132 | 0.100 |

Force-field parameters of the ionic liquid ions are given in the form of .itp files.  
**ea.itp**

[ moleculetype ]

```
; Name      nrexcl  
eam        3
```

[ atoms ]

```
; nr  type  resnr residue atom  cgnr  charge  mass typeB  chargeB  
  1   CT   1   EAM   C1   1  -0.238064 12.000000  
  2   HC   1   EAM   H1   2   0.10212  1.000000  
  3   HC   1   EAM   H2   3   0.10212  1.000000  
  4   HC   1   EAM   H3   4   0.10212  1.000000  
  5   CT   1   EAM   C2   5   0.094624 12.000000  
  6   H1   1   EAM   H4   6   0.083008  1.000000  
  7   H1   1   EAM   H5   7   0.083008  1.000000  
  8    N   1   EAM   N1   8  -0.379448 14.000000  
  9    H   1   EAM   H6   9   0.283504  1.000000  
 10    H   1   EAM   H7  10   0.283504  1.000000  
 11    H   1   EAM   H8  11   0.283504  1.000000
```

[ bonds ]

```
; ai  aj funct r k  
  8   9   1 1.0330e-01 3.0878e+05  
  8  10   1 1.0330e-01 3.0878e+05  
  8  11   1 1.0330e-01 3.0878e+05  
  5   6   1 1.0910e-01 2.8342e+05  
  5   7   1 1.0910e-01 2.8342e+05  
  1   2   1 1.0920e-01 2.8225e+05  
  1   3   1 1.0920e-01 2.8225e+05  
  1   4   1 1.0920e-01 2.8225e+05  
  5   8   1 1.4990e-01 2.4568e+05  
  1   5   1 1.5350e-01 2.5363e+05
```

[ pairs ]

```
; ai  aj funct  
  7   9   1  
  7  10   1  
  7  11   1  
  6   9   1  
  6  10   1  
  6  11   1  
  4   6   1  
  4   7   1  
  4   8   1  
  3   6   1
```

```

3 7 1
3 8 1
2 6 1
2 7 1
2 8 1
1 9 1
1 10 1
1 11 1

```

[ angles ]

```

; ai aj ak funct theta cth
10 8 11 1 1.0811e+02 3.3907e+02
9 8 10 1 1.0811e+02 3.3907e+02
9 8 11 1 1.0811e+02 3.3907e+02
7 5 8 1 1.0791e+02 4.1020e+02
6 5 7 1 1.1074e+02 3.2669e+02
6 5 8 1 1.0791e+02 4.1020e+02
5 8 9 1 1.1011e+02 3.8652e+02
5 8 10 1 1.1011e+02 3.8652e+02
5 8 11 1 1.1011e+02 3.8652e+02
4 1 5 1 1.1005e+02 3.8802e+02
3 1 4 1 1.0835e+02 3.2995e+02
3 1 5 1 1.1005e+02 3.8802e+02
2 1 3 1 1.0835e+02 3.2995e+02
2 1 4 1 1.0835e+02 3.2995e+02
2 1 5 1 1.1005e+02 3.8802e+02
1 5 6 1 1.1174e+02 3.8510e+02
1 5 7 1 1.1174e+02 3.8510e+02
1 5 8 1 1.1432e+02 5.3932e+02

```

[ dihedrals ]

```

;i j k l func C0 ... C5
7 5 8 9 3 0.65270 1.95811 0.00000 -2.61082 0.00000 0.00000 ;
7 5 8 10 3 0.65270 1.95811 0.00000 -2.61082 0.00000 0.00000 ;
7 5 8 11 3 0.65270 1.95811 0.00000 -2.61082 0.00000 0.00000 ;
6 5 8 9 3 0.65270 1.95811 0.00000 -2.61082 0.00000 0.00000 ;
6 5 8 10 3 0.65270 1.95811 0.00000 -2.61082 0.00000 0.00000 ;
6 5 8 11 3 0.65270 1.95811 0.00000 -2.61082 0.00000 0.00000 ;
4 1 5 6 3 0.65270 1.95811 0.00000 -2.61082 0.00000 0.00000 ;
4 1 5 7 3 0.65270 1.95811 0.00000 -2.61082 0.00000 0.00000 ;
4 1 5 8 3 0.65270 1.95811 0.00000 -2.61082 0.00000 0.00000 ;
3 1 5 6 3 0.65270 1.95811 0.00000 -2.61082 0.00000 0.00000 ;
3 1 5 7 3 0.65270 1.95811 0.00000 -2.61082 0.00000 0.00000 ;
3 1 5 8 3 0.65270 1.95811 0.00000 -2.61082 0.00000 0.00000 ;
2 1 5 6 3 0.65270 1.95811 0.00000 -2.61082 0.00000 0.00000 ;
2 1 5 7 3 0.65270 1.95811 0.00000 -2.61082 0.00000 0.00000 ;

```

```

2 1 5 8 3 0.65270 1.95811 0.00000 -2.61082 0.00000 0.00000 ;
1 5 8 9 3 0.65270 1.95811 0.00000 -2.61082 0.00000 0.00000 ;
1 5 8 10 3 0.65270 1.95811 0.00000 -2.61082 0.00000 0.00000 ;
1 5 8 11 3 0.65270 1.95811 0.00000 -2.61082 0.00000 0.00000 ;

```

### nitrate.itp

[ moleculetype ]

```

; Name      nrexcl
nitrate     3

```

[ atoms ]

```

; nr  type  resnr  residue  atom  cgnr  charge  mass  typeB  chargeB
  1   O2    1   NIT    O1    1  -0.539408 16.000000
  2    N    1   NIT    N1    2   0.818224 14.000000
  3   O2    1   NIT    O2    3  -0.539408 16.000000
  4   O2    1   NIT    O3    4  -0.539408 16.000000

```

[ bonds ]

```

; ai  aj  funct  r  k
  2   3   1  1.2190e-01  6.3697e+05
  2   4   1  1.2190e-01  6.3697e+05
  1   2   1  1.2190e-01  6.3697e+05

```

[ pairs ]

```

; ai  aj  funct

```

[ angles ]

```

; ai  aj  ak  funct  theta  cth
  3   2   4   1  1.2513e+02  6.4559e+02
  1   2   3   1  1.2513e+02  6.4559e+02
  1   2   4   1  1.2513e+02  6.4559e+02

```

### tea.itp

[ moleculetype ]

```

; Name      nrexcl
tea         3

```

[ atoms ]

```

; nr  type  resnr  residue  atom  cgnr  charge  mass  typeB  chargeB
  1   CT    1   TEA    C2    1  -0.190376 12.000000

```



|    |    |   |     |     |    |           |           |
|----|----|---|-----|-----|----|-----------|-----------|
| 2  | HC | 1 | TEA | H4  | 2  | 0.09144   | 1.000000  |
| 3  | HC | 1 | TEA | H5  | 3  | 0.09144   | 1.000000  |
| 4  | HC | 1 | TEA | H6  | 4  | 0.09144   | 1.000000  |
| 5  | CT | 1 | TEA | C1  | 5  | -0.066968 | 12.000000 |
| 6  | H1 | 1 | TEA | H2  | 6  | 0.111376  | 1.000000  |
| 7  | H1 | 1 | TEA | H3  | 7  | 0.111376  | 1.000000  |
| 8  | N  | 1 | TEA | N1  | 8  | -0.17632  | 14.000000 |
| 9  | H  | 1 | TEA | H1  | 9  | 0.257136  | 1.000000  |
| 10 | CT | 1 | TEA | C5  | 10 | -0.066968 | 12.000000 |
| 11 | H1 | 1 | TEA | H12 | 11 | 0.111376  | 1.000000  |
| 12 | H1 | 1 | TEA | H13 | 12 | 0.111376  | 1.000000  |
| 13 | CT | 1 | TEA | C6  | 13 | -0.190376 | 12.000000 |
| 14 | HC | 1 | TEA | H14 | 14 | 0.09144   | 1.000000  |
| 15 | HC | 1 | TEA | H15 | 15 | 0.09144   | 1.000000  |
| 16 | HC | 1 | TEA | H16 | 16 | 0.09144   | 1.000000  |
| 17 | CT | 1 | TEA | C3  | 17 | -0.066968 | 12.000000 |
| 18 | H1 | 1 | TEA | H7  | 18 | 0.111376  | 1.000000  |
| 19 | H1 | 1 | TEA | H8  | 19 | 0.111376  | 1.000000  |
| 20 | CT | 1 | TEA | C4  | 20 | -0.190376 | 12.000000 |
| 21 | HC | 1 | TEA | H9  | 21 | 0.09144   | 1.000000  |
| 22 | HC | 1 | TEA | H10 | 22 | 0.09144   | 1.000000  |
| 23 | HC | 1 | TEA | H11 | 23 | 0.09144   | 1.000000  |

[ bonds ]

; ai aj funct r k

|    |    |   |            |            |
|----|----|---|------------|------------|
| 20 | 21 | 1 | 1.0920e-01 | 2.8225e+05 |
| 20 | 22 | 1 | 1.0920e-01 | 2.8225e+05 |
| 20 | 23 | 1 | 1.0920e-01 | 2.8225e+05 |
| 17 | 18 | 1 | 1.0910e-01 | 2.8342e+05 |
| 17 | 19 | 1 | 1.0910e-01 | 2.8342e+05 |
| 13 | 14 | 1 | 1.0920e-01 | 2.8225e+05 |
| 13 | 15 | 1 | 1.0920e-01 | 2.8225e+05 |
| 13 | 16 | 1 | 1.0920e-01 | 2.8225e+05 |
| 10 | 11 | 1 | 1.0910e-01 | 2.8342e+05 |
| 10 | 12 | 1 | 1.0910e-01 | 2.8342e+05 |
| 8  | 9  | 1 | 1.0330e-01 | 3.0878e+05 |
| 5  | 6  | 1 | 1.0910e-01 | 2.8342e+05 |
| 5  | 7  | 1 | 1.0910e-01 | 2.8342e+05 |
| 1  | 2  | 1 | 1.0920e-01 | 2.8225e+05 |
| 1  | 3  | 1 | 1.0920e-01 | 2.8225e+05 |
| 1  | 4  | 1 | 1.0920e-01 | 2.8225e+05 |
| 17 | 20 | 1 | 1.5350e-01 | 2.5363e+05 |
| 10 | 13 | 1 | 1.5350e-01 | 2.5363e+05 |
| 8  | 10 | 1 | 1.4990e-01 | 2.4568e+05 |
| 8  | 17 | 1 | 1.4990e-01 | 2.4568e+05 |
| 5  | 8  | 1 | 1.4990e-01 | 2.4568e+05 |

1 5 1 1.5350e-01 2.5363e+05

[ pairs ]

; ai aj funct

|    |    |   |
|----|----|---|
| 19 | 21 | 1 |
| 19 | 22 | 1 |
| 19 | 23 | 1 |
| 18 | 21 | 1 |
| 18 | 22 | 1 |
| 18 | 23 | 1 |
| 12 | 17 | 1 |
| 12 | 14 | 1 |
| 12 | 15 | 1 |
| 12 | 16 | 1 |
| 11 | 17 | 1 |
| 11 | 14 | 1 |
| 11 | 15 | 1 |
| 11 | 16 | 1 |
| 10 | 18 | 1 |
| 10 | 19 | 1 |
| 9  | 11 | 1 |
| 9  | 12 | 1 |
| 9  | 13 | 1 |
| 9  | 18 | 1 |
| 9  | 19 | 1 |
| 9  | 20 | 1 |
| 8  | 14 | 1 |
| 8  | 15 | 1 |
| 8  | 16 | 1 |
| 8  | 21 | 1 |
| 8  | 22 | 1 |
| 8  | 23 | 1 |
| 7  | 9  | 1 |
| 7  | 10 | 1 |
| 7  | 17 | 1 |
| 6  | 9  | 1 |
| 6  | 10 | 1 |
| 6  | 17 | 1 |
| 5  | 11 | 1 |
| 5  | 12 | 1 |
| 5  | 18 | 1 |
| 5  | 19 | 1 |
| 4  | 6  | 1 |
| 4  | 7  | 1 |
| 4  | 8  | 1 |
| 3  | 6  | 1 |

```

3 7 1
3 8 1
2 6 1
2 7 1
2 8 1
1 9 1
13 17 1
10 20 1
5 13 1
5 20 1
1 10 1
1 17 1

```

[ angles ]

```

; ai aj ak funct theta cth
22 20 23 1 1.0835e+02 3.2995e+02
21 20 22 1 1.0835e+02 3.2995e+02
21 20 23 1 1.0835e+02 3.2995e+02
19 17 20 1 1.1174e+02 3.8510e+02
18 17 19 1 1.1074e+02 3.2669e+02
18 17 20 1 1.1174e+02 3.8510e+02
17 20 21 1 1.1005e+02 3.8802e+02
17 20 22 1 1.1005e+02 3.8802e+02
17 20 23 1 1.1005e+02 3.8802e+02
15 13 16 1 1.0835e+02 3.2995e+02
14 13 15 1 1.0835e+02 3.2995e+02
14 13 16 1 1.0835e+02 3.2995e+02
12 10 13 1 1.1174e+02 3.8510e+02
11 10 12 1 1.1074e+02 3.2669e+02
11 10 13 1 1.1174e+02 3.8510e+02
10 13 14 1 1.1005e+02 3.8802e+02
10 13 15 1 1.1005e+02 3.8802e+02
10 13 16 1 1.1005e+02 3.8802e+02
9 8 10 1 1.1011e+02 3.8652e+02
9 8 17 1 1.1011e+02 3.8652e+02
8 10 11 1 1.0791e+02 4.1020e+02
8 10 12 1 1.0791e+02 4.1020e+02
8 17 18 1 1.0791e+02 4.1020e+02
8 17 19 1 1.0791e+02 4.1020e+02
7 5 8 1 1.0791e+02 4.1020e+02
6 5 7 1 1.1074e+02 3.2669e+02
6 5 8 1 1.0791e+02 4.1020e+02
5 8 9 1 1.1011e+02 3.8652e+02
4 1 5 1 1.1005e+02 3.8802e+02
3 1 4 1 1.0835e+02 3.2995e+02
3 1 5 1 1.1005e+02 3.8802e+02

```



```

6 5 8 10 3 0.65270 1.95811 0.00000 -2.61082 0.00000 0.00000 ;
6 5 8 17 3 0.65270 1.95811 0.00000 -2.61082 0.00000 0.00000 ;
5 8 10 11 3 0.65270 1.95811 0.00000 -2.61082 0.00000 0.00000 ;
5 8 10 12 3 0.65270 1.95811 0.00000 -2.61082 0.00000 0.00000 ;
5 8 17 18 3 0.65270 1.95811 0.00000 -2.61082 0.00000 0.00000 ;
5 8 17 19 3 0.65270 1.95811 0.00000 -2.61082 0.00000 0.00000 ;
4 1 5 6 3 0.65270 1.95811 0.00000 -2.61082 0.00000 0.00000 ;
4 1 5 7 3 0.65270 1.95811 0.00000 -2.61082 0.00000 0.00000 ;
4 1 5 8 3 0.65270 1.95811 0.00000 -2.61082 0.00000 0.00000 ;
3 1 5 6 3 0.65270 1.95811 0.00000 -2.61082 0.00000 0.00000 ;
3 1 5 7 3 0.65270 1.95811 0.00000 -2.61082 0.00000 0.00000 ;
3 1 5 8 3 0.65270 1.95811 0.00000 -2.61082 0.00000 0.00000 ;
2 1 5 6 3 0.65270 1.95811 0.00000 -2.61082 0.00000 0.00000 ;
2 1 5 7 3 0.65270 1.95811 0.00000 -2.61082 0.00000 0.00000 ;
2 1 5 8 3 0.65270 1.95811 0.00000 -2.61082 0.00000 0.00000 ;
1 5 8 9 3 0.65270 1.95811 0.00000 -2.61082 0.00000 0.00000 ;
13 10 8 17 3 0.65270 1.95811 0.00000 -2.61082 0.00000 0.00000 ;
10 8 17 20 3 0.65270 1.95811 0.00000 -2.61082 0.00000 0.00000 ;
5 8 10 13 3 0.65270 1.95811 0.00000 -2.61082 0.00000 0.00000 ;
5 8 17 20 3 0.65270 1.95811 0.00000 -2.61082 0.00000 0.00000 ;
1 5 8 10 3 0.65270 1.95811 0.00000 -2.61082 0.00000 0.00000 ;
1 5 8 17 3 0.65270 1.95811 0.00000 -2.61082 0.00000 0.00000 ;

```

### mesylate.itp

[ moleculetype ]

```

; Name      nrexcl
mesylate    3

```

[ atoms ]

```

; nr  type  resnr  residue  atom  cgnr  charge  mass  typeB  chargeB
  1   CT    1   MES    C1    1  -0.314216 12.000000
  2   H1    1   MES    H1    2   0.071328 1.000000
  3   H1    1   MES    H2    3   0.071328 1.000000
  4   H1    1   MES    H3    4   0.071328 1.000000
  5    S    1   MES    S1    5   0.985656 32.100000
  6   O2    1   MES    O2    6  -0.561808 16.000000
  7   O2    1   MES    O3    7  -0.561808 16.000000
  8   O2    1   MES    O1    8  -0.561808 16.000000

```

[ bonds ]

```

; ai  aj  funct  r  k
  1   2   1  1.0930e-01  2.8108e+05
  1   3   1  1.0930e-01  2.8108e+05
  1   4   1  1.0930e-01  2.8108e+05
  5   6   1  1.4360e-01  4.5279e+05

```

```

5 7 1 1.4360e-01 4.5279e+05
5 8 1 1.4360e-01 4.5279e+05
1 5 1 1.7740e-01 2.1255e+05

```

```

[ pairs ]
; ai aj funct
 4 6 1
 4 7 1
 4 8 1
 3 6 1
 3 7 1
 3 8 1
 2 6 1
 2 7 1
 2 8 1

```

```

[ angles ]
; ai aj ak funct theta cth
 4 1 5 1 1.0811e+02 3.6702e+02
 3 1 4 1 1.0955e+02 3.2786e+02
 3 1 5 1 1.0811e+02 3.6702e+02
 2 1 3 1 1.0955e+02 3.2786e+02
 2 1 4 1 1.0955e+02 3.2786e+02
 2 1 5 1 1.0811e+02 3.6702e+02
 7 5 8 1 1.1973e+02 6.2409e+02
 6 5 7 1 1.1973e+02 6.2409e+02
 6 5 8 1 1.1973e+02 6.2409e+02
 1 5 6 1 1.0832e+02 5.5723e+02
 1 5 7 1 1.0832e+02 5.5723e+02
 1 5 8 1 1.0832e+02 5.5723e+02

```

```

[ dihedrals ]
; i j k l func C0 ... C5
 4 1 5 6 3 0.60250 1.80749 0.00000 -2.40998 0.00000 0.00000 ;
 4 1 5 7 3 0.60250 1.80749 0.00000 -2.40998 0.00000 0.00000 ;
 4 1 5 8 3 0.60250 1.80749 0.00000 -2.40998 0.00000 0.00000 ;
 3 1 5 6 3 0.60250 1.80749 0.00000 -2.40998 0.00000 0.00000 ;
 3 1 5 7 3 0.60250 1.80749 0.00000 -2.40998 0.00000 0.00000 ;
 3 1 5 8 3 0.60250 1.80749 0.00000 -2.40998 0.00000 0.00000 ;
 2 1 5 6 3 0.60250 1.80749 0.00000 -2.40998 0.00000 0.00000 ;
 2 1 5 7 3 0.60250 1.80749 0.00000 -2.40998 0.00000 0.00000 ;
 2 1 5 8 3 0.60250 1.80749 0.00000 -2.40998 0.00000 0.00000 ;

```
